# Supplementary material
Source: PubMed Central journal article supplement (PMC10279548)
Supplement: BLOODA_ADV-2022-009550-mmc1.pdf [file BLOODA_ADV-2022-009550-mmc1.pdf]

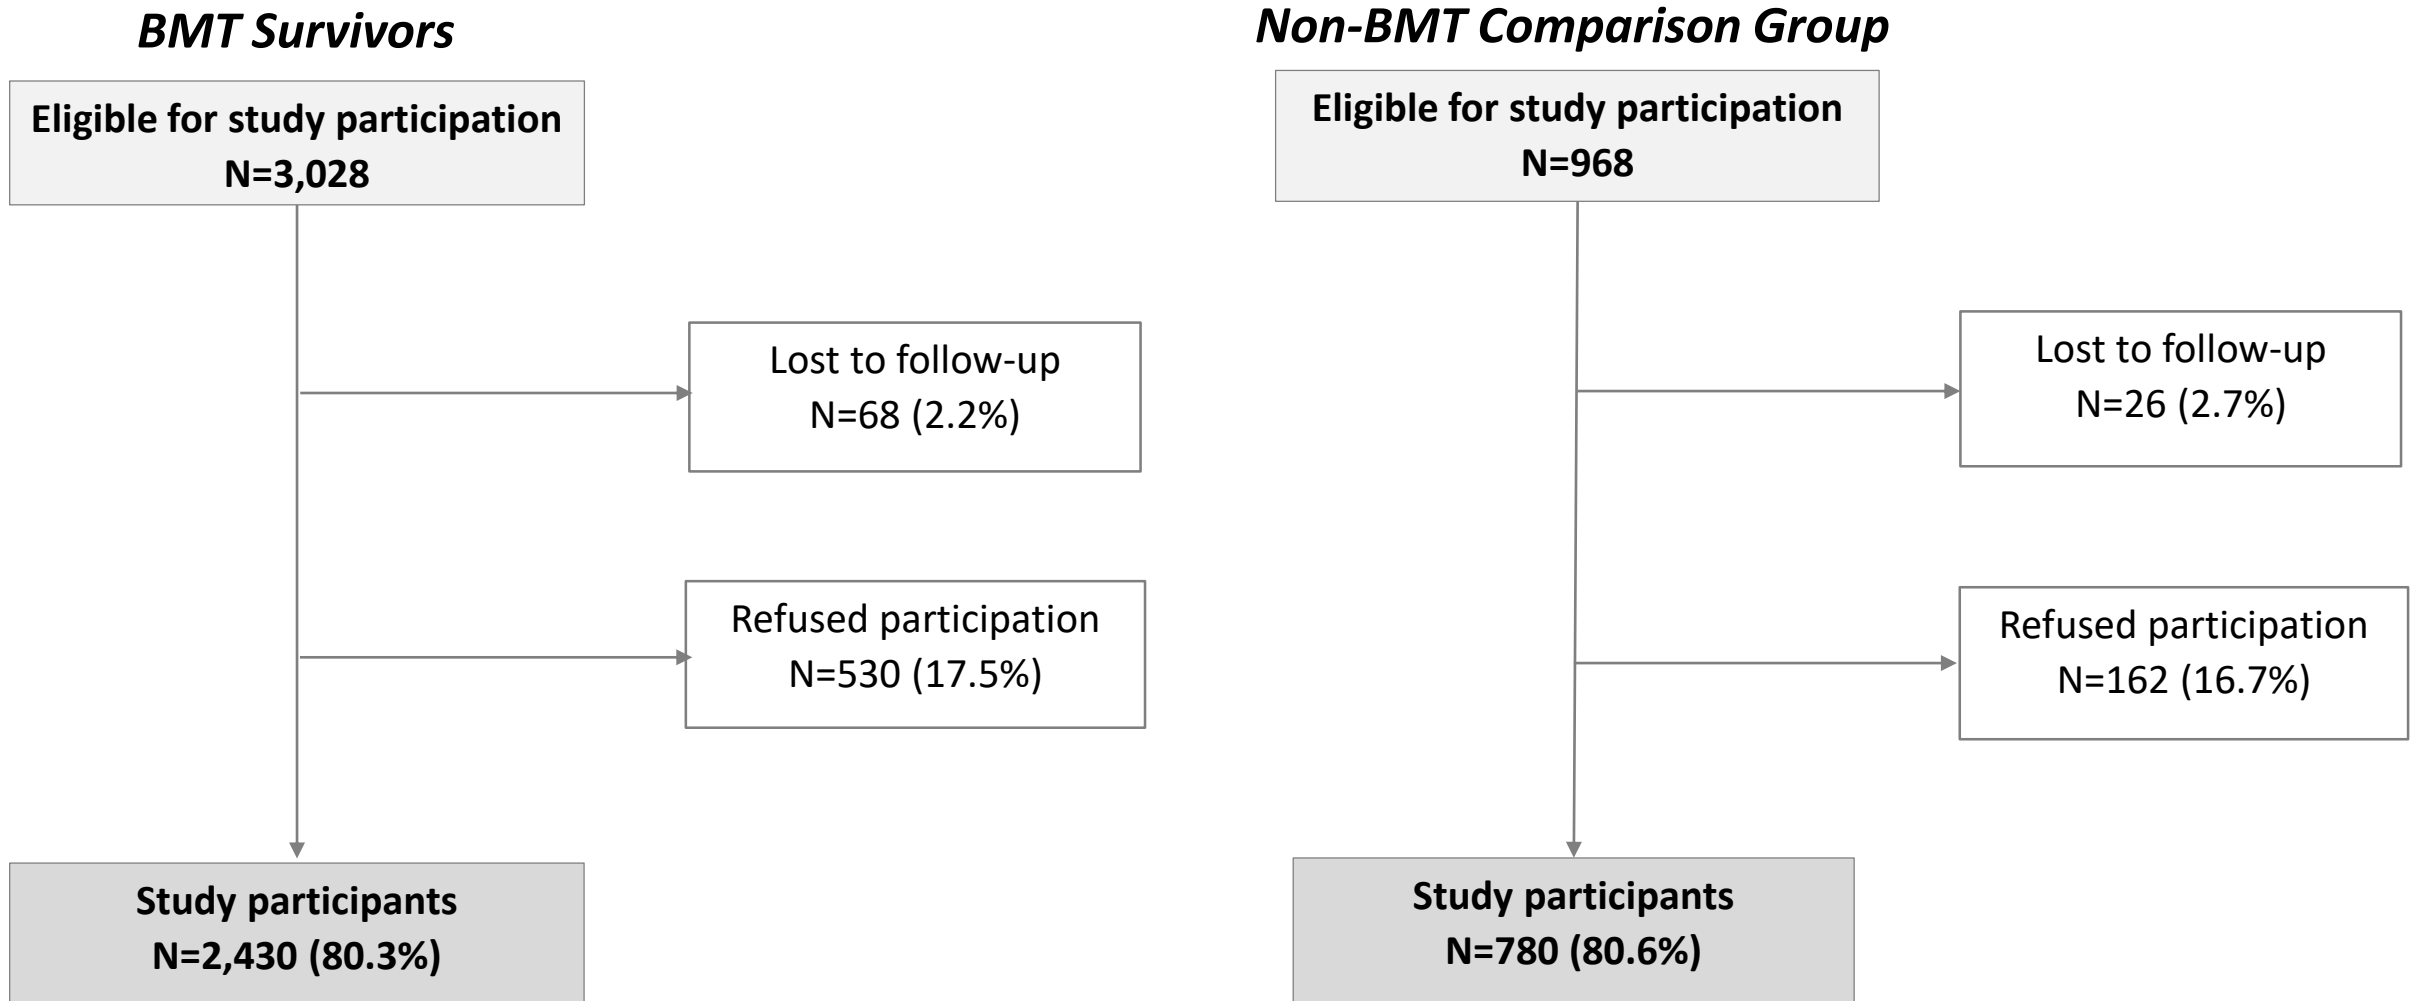

**Supplemental Figure 1: Consort Diagram of the study population**

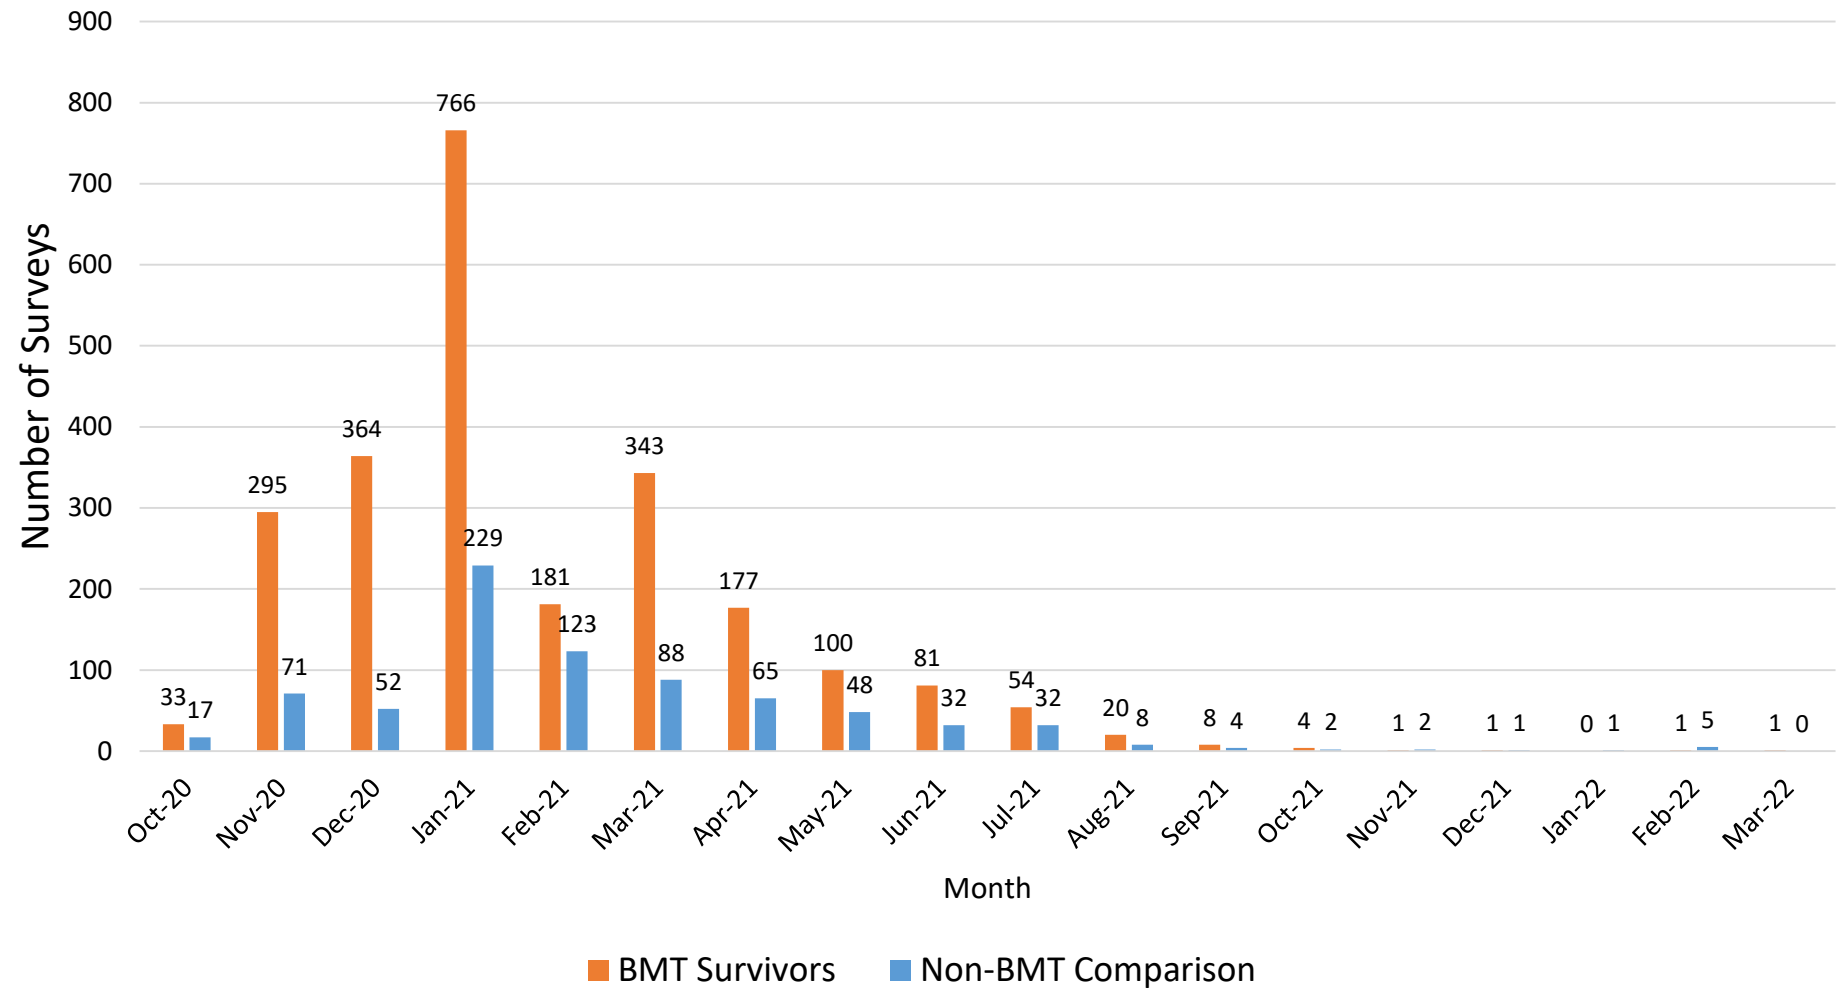

**Supplemental Figure 2: Surveys Returned per Month by BMT Survivors and Non-BMT Comparison Group**

**As part of COVID-19 (Coronavirus) pandemic, we are asking you to complete this survey to help us understand the risk of Coronavirus infection and its consequences.**

**A1. Have you been tested for the novel coronavirus (COVID-19)?**

- No
- Yes *(If yes, please answer the following box)*

**Test #1**

Date of testing #1      
*Month (MM) Year (YYYY)*

Type of testing #1  Swab  Blood

Was the test positive?  Yes  No

**Test #2**

Date of testing #2      
*Month (MM) Year (YYYY)*

Type of testing #2  Swab  Blood

Was the test positive?  Yes  No

**Test #3**

Date of testing #3      
*Month (MM) Year (YYYY)*

Type of testing #3  Swab  Blood

Was the test positive?  Yes  No

**A2. Was anyone in your immediate work group diagnosed with novel coronavirus (COVID-19)?**

- No
- Yes
- Not applicable, I do not work outside the home
- Don't know

**A3. Was anyone in your household diagnosed with novel coronavirus (COVID-19)?**

- No  Yes  Don't know

*(If yes, then please provide the relationship (check **all** that apply):*

Mother      
*Month (MM) Year (YYYY)*

Father      
*Month (MM) Year (YYYY)*

Spouse/  
significant other      
*Month (MM) Year (YYYY)*

Child #1      
*Month (MM) Year (YYYY)*

Child #2      
*Month (MM) Year (YYYY)*

Child #3      
*Month (MM) Year (YYYY)*

Sibling #1      
*Month (MM) Year (YYYY)*

Sibling #2      
*Month (MM) Year (YYYY)*

Sibling #3      
*Month (MM) Year (YYYY)*

Other      
*Month (MM) Year (YYYY)*

If Other, please describe relationship:

**A4. Were any of your friends diagnosed with the novel coronavirus (COVID-19)?**

- No
- Yes
- Don't know

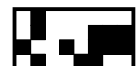

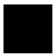

## SOCIAL DISTANCING

During the Coronavirus pandemic, recommendations have been made to maintain social distancing. These questions pertain to specifics of social distancing since March 1, 2020.

|                                                                                              | No, never                | Yes, always              | Yes, sometimes           |
|----------------------------------------------------------------------------------------------|--------------------------|--------------------------|--------------------------|
| B1. Do you wear a mask when in public places? .....                                          | <input type="checkbox"/> | <input type="checkbox"/> | <input type="checkbox"/> |
| B2. Do you stay at least 6 feet away from others who are not members of your household?..... | <input type="checkbox"/> | <input type="checkbox"/> | <input type="checkbox"/> |
| B3. Do you wash your hands at least 10 times a day for 20 seconds each time ? .....          | <input type="checkbox"/> | <input type="checkbox"/> | <input type="checkbox"/> |

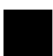

**Supplemental Table 1. Chronical Health Conditions**

| Chronic Health Conditions     | BMT <sup>a</sup> Survivors<br>(n=2430) | Non-BMT Comparison Group<br>(n=779) | p-value |
|-------------------------------|----------------------------------------|-------------------------------------|---------|
| Arrhythmias                   | 34 (1.4%)                              | 3 (0.4%)                            | n/a     |
| Blood Clot                    | 270 (11.1%)                            | 25 (3.2%)                           | <.0001  |
| Cataracts                     | 476 (19.6%)                            | 53 (6.8%)                           | <.0001  |
| Congestive Heart Failure      | 267 (11.0%)                            | 45 (5.8%)                           | <.0001  |
| Diabetes                      | 184 (7.6%)                             | 11 (1.4%)                           | <.0001  |
| Hearing Loss                  | 264 (10.9%)                            | 53 (6.8%)                           | 0.001   |
| Heart Attack                  | 48 (2.0%)                              | 8 (1.0%)                            | 0.08    |
| Hemodialysis                  | 39 (1.6%)                              | 1 (0.1%)                            | n/a     |
| Intestinal Obstruction        | 72 (3.0%)                              | 6 (0.8%)                            | 0.001   |
| Joint Replacement             | 218 (9.0%)                             | 49 (6.3%)                           | 0.02    |
| Legally Blind                 | 84 (3.5%)                              | 18 (2.3%)                           | 0.11    |
| Liver Dysfunction             | 33 (1.4%)                              | 2 (0.3%)                            | n/a     |
| Lung Fibrosis                 | 45 (1.9%)                              | 2 (0.3%)                            | n/a     |
| Stroke                        | 76 (3.1%)                              | 13 (1.7%)                           | 0.03    |
| Thyroid nodules               | 77 (3.2%)                              | 19 (2.4%)                           | 0.3     |
| Cardiovascular <sup>b</sup>   | 347 (14.3%)                            | 61 (7.8%)                           | <.0001  |
| Gastrointestinal <sup>c</sup> | 116 (4.8%)                             | 9 (1.2%)                            | <.0001  |
| Sensorineural <sup>d</sup>    | 362 (14.9%)                            | 70 (9.0%)                           | <.0001  |

a: Blood or marrow transplant; b: Cardiovascular includes heart attack, congestive heart failure, stroke, stiff or leaky valve, arrhythmia; c: Gastrointestinal includes liver disease/Rectal/Intestinal obstruction; d: Sensorineural includes hearing loss, balance/vertigo, legally blind

**Supplemental Table 2. Characteristics of Study Participants in the Pre- and Post-Vaccine Eras**

| Characteristics                                                                          | Pre-vaccine era       |                            |         | Post-vaccine era                    |                            |         |
|------------------------------------------------------------------------------------------|-----------------------|----------------------------|---------|-------------------------------------|----------------------------|---------|
|                                                                                          | BMT Survivors (n=750) | Non-BMT Comparison (n=148) | p-value | BMT <sup>a</sup> Survivors (n=1680) | Non-BMT Comparison (n=632) | p-value |
| <b>Age at study participation</b>                                                        |                       |                            |         |                                     |                            |         |
| Median (range)                                                                           | 62 (21 - 90)          | 62.5 (22 - 88)             | 0.39    | 64 (20 - 91)                        | 62 (21 - 88)               | 0.0017  |
| <65 years                                                                                | 455 (60.7%)           | 85 (57.4%)                 | 0.46    | 862 (51.3%)                         | 363 (57.4%)                | 0.0085  |
| ≥65 years                                                                                | 295(39.3%)            | 63 (42.6%)                 |         | 818 (48.7%)                         | 269 (42.6%)                |         |
| <b>Race/ Ethnicity</b>                                                                   |                       |                            |         |                                     |                            |         |
| African American                                                                         | 13 (1.7%)             | 0 (0%)                     | <.0001  | 118 (7.0%)                          | 20 (3.2%)                  | <.0001  |
| Hispanic                                                                                 | 58 (7.7%)             | 1 (0.7%)                   |         | 199 (11.8%)                         | 43 (6.8%)                  |         |
| Non-Hispanic White                                                                       | 622 (82.9%)           | 146 (98.6%)                |         | 1,233 (73.4%)                       | 540 (85.4%)                |         |
| Other                                                                                    | 57 (7.6%)             | 1 (0.7%)                   |         | 130 (7.7%)                          | 29 (4.6%)                  |         |
| <b>Sex</b>                                                                               |                       |                            |         |                                     |                            |         |
| Female                                                                                   | 376 (50.1%)           | 102 (68.9%)                | <.0001  | 771 (45.9%)                         | 400 (63.3%)                | <.0001  |
| <b>Contact with COVID-19 test positive individuals (family members/ friends/at work)</b> |                       |                            |         |                                     |                            |         |
| Yes                                                                                      | 246 (32.8%)           | 70 (47.3%)                 | 0.001   | 835 (49.7%)                         | 372 (58.9%)                | <.0001  |
| <b>Always Wear Mask</b>                                                                  |                       |                            |         |                                     |                            |         |
| Yes                                                                                      | 652 (86.9%)           | 122 (82.4%)                | 0.15    | 1,494 (88.9%)                       | 540 (85.4%)                | 0.022   |
| <b>Always Stay 6 Feet Away</b>                                                           |                       |                            |         |                                     |                            |         |
| Yes                                                                                      | 524 (69.9%)           | 85 (57.4%)                 | 0.003   | 1,204 (71.7%)                       | 379 (60.0%)                | <.0001  |
| <b>Always Wash Hands</b>                                                                 |                       |                            |         |                                     |                            |         |
| Yes                                                                                      | 353 (47.1%)           | 55 (37.2%)                 | 0.03    | 855 (50.9%)                         | 267 (42.2%)                | 0.0002  |
| <b>Annual Household Income</b>                                                           |                       |                            |         |                                     |                            |         |
| <\$50,000                                                                                | 193 (25.7%)           | 23 (15.5%)                 | 0.01    | 456 (27.1%)                         | 119 (18.8%)                | <.0001  |
| \$50,000-74,999                                                                          | 115 (15.3%)           | 37 (25.0%)                 |         | 256 (15.2%)                         | 109 (17.2%)                |         |
| ≥\$75,000                                                                                | 338 (45.1%)           | 69 (46.6%)                 |         | 731 (43.5%)                         | 354 (56.0%)                |         |
| Missing                                                                                  | 104 (13.9%)           | 19 (12.8%)                 |         | 237 (14.1%)                         | 50 (7.9%)                  |         |
| <b>Education</b>                                                                         |                       |                            |         |                                     |                            |         |
| <High School                                                                             | 101 (13.5%)           | 15 (10.1%)                 | 0.54    | 276 (16.4%)                         | 65 (10.4%)                 | <.0001  |
| High School to College                                                                   | 270 (36.0%)           | 55 (37.2%)                 |         | 613 (36.5%)                         | 207 (33.0%)                |         |
| ≥College                                                                                 | 379 (50.5%)           | 78 (52.7%)                 |         | 790 (47.1%)                         | 355 (56.6%)                |         |
| <b>Have Insurance</b>                                                                    |                       |                            |         |                                     |                            |         |
| Yes                                                                                      | 742 (98.9%)           | 148 (100.0%)               | 0.21    | 1,639 (97.6%)                       | 609 (97.1%)                | 0.51    |
| <b>Chronic Health Conditions (severe/life-threatening)</b>                               |                       |                            |         |                                     |                            |         |
| Yes                                                                                      | 378 (50.4%)           | 51 (34.5%)                 | 0.0004  | 649 (38.6%)                         | 175 (27.9%)                | <.0001  |
| <b>COVID-19 test positive</b>                                                            |                       |                            |         |                                     |                            |         |
| Yes                                                                                      | 17 (2.3%)             | 3 (2.0%)                   | 0.86    | 104 (6.2%)                          | 44 (7.0%)                  | 0.50    |
| <b>Employment</b>                                                                        |                       |                            |         |                                     |                            |         |
| Employed                                                                                 | 349 (46.5%)           | 87 (59.2%)                 | 0.0002  | 689 (41.3%)                         | 369 (58.6%)                | <.0001  |
| Not Employed                                                                             | 133 (17.7%)           | 7 (4.8%)                   |         | 268 (16.0%)                         | 45 (7.1%)                  |         |
| Retired                                                                                  | 268 (35.7%)           | 53 (36.1%)                 |         | 713 (42.7%)                         | 216 (34.3%)                |         |
| <b>BMT Type</b>                                                                          |                       |                            |         |                                     |                            |         |
| Autologous                                                                               | 20 (2.7%)             |                            |         | 1,097 (66.4%)                       |                            |         |

| Characteristics                                   | Pre-vaccine era       |                            |         | Post-vaccine era                    |                            |         |
|---------------------------------------------------|-----------------------|----------------------------|---------|-------------------------------------|----------------------------|---------|
|                                                   | BMT Survivors (n=750) | Non-BMT Comparison (n=148) | p-value | BMT <sup>a</sup> Survivors (n=1680) | Non-BMT Comparison (n=632) | p-value |
| Allogeneic without chronic GvHD <sup>b</sup>      | 348 (47.7%)           |                            |         | 214 (13.0%)                         |                            |         |
| Allogeneic with chronic GvHD                      | 362 (49.6%)           |                            |         | 341 (20.6%)                         |                            |         |
| <b>BMT Survivors Follow up years</b>              |                       |                            |         |                                     |                            |         |
| Median (range)                                    | 15 (6 - 45)           |                            |         | 14 (6 - 46)                         |                            |         |
| <10 years                                         | 157 (20.9%)           |                            |         | 414 (24.6%)                         |                            |         |
| 10-19 years                                       | 319 (42.5%)           |                            |         | 803 (47.8%)                         |                            |         |
| ≥20 years                                         | 274 (36.5%)           |                            |         | 463 (27.6%)                         |                            |         |
| <b>BMT Survivors Primary Cancer</b>               |                       |                            |         |                                     |                            |         |
| Leukemia                                          | 521 (69.5%)           |                            |         | 485 (28.9%)                         |                            |         |
| Lymphoma                                          | 123 (16.4%)           |                            |         | 671 (39.9%)                         |                            |         |
| Plasma cell dyscrasias                            | 29 (3.9%)             |                            |         | 419 (24.9%)                         |                            |         |
| Other                                             | 77 (10.3%)            |                            |         | 105 (6.3%)                          |                            |         |
| <b>BMT Survivors Conditioning Intensity</b>       |                       |                            |         |                                     |                            |         |
| Myeloablative conditioning                        | 370 (49.3%)           |                            |         | 1,240 (73.8%)                       |                            |         |
| Non-myeloablative/ reduced intensity conditioning | 380 (50.7%)           |                            |         | 440 (26.2%)                         |                            |         |
| <b>Disease Status at BMT</b>                      |                       |                            |         |                                     |                            |         |
| High risk                                         | 265 (35.3%)           |                            |         | 796 (47.4%)                         |                            |         |

a: Blood or marrow transplant; b: Graft-versus-host disease

**Supplemental Table 3. Risk of COVID-19 infection in BMT<sup>a</sup> Survivors vs. non-BMT comparison by availability of COVID vaccines**

| Variable                                                                                 | Multivariable analysis (pre-vaccine era) |               |                   | Multivariable analysis (post-vaccine era) |             |                    |
|------------------------------------------------------------------------------------------|------------------------------------------|---------------|-------------------|-------------------------------------------|-------------|--------------------|
|                                                                                          | aOR                                      | 95%CI         | p-value           | aOR                                       | 95%CI       | p-value            |
| <b>BMT Survivors vs. non-BMT Comparison Group</b>                                        |                                          |               |                   |                                           |             |                    |
| Non-BMT Comparison                                                                       | REF                                      |               |                   | REF                                       |             |                    |
| BMT Survivors                                                                            | 1.58                                     | 0.40 - 6.15   | 0.51              | 0.92                                      | 0.62 - 1.36 | 0.67               |
| <b>Age at study participation</b>                                                        |                                          |               |                   |                                           |             |                    |
| <65 years                                                                                | REF                                      |               |                   | REF                                       |             |                    |
| ≥65 years                                                                                | 0.67                                     | 0.16 - 2.80   | 0.58              | 0.98                                      | 0.61 - 1.56 | 0.93               |
| <b>Race/ Ethnicity</b>                                                                   |                                          |               |                   |                                           |             |                    |
| Non-Hispanic White                                                                       | REF                                      |               | 0.22 <sup>b</sup> | REF                                       |             | 0.10 <sup>b</sup>  |
| African American                                                                         | 17.48                                    | 1.19 - 256.49 | 0.04              | 1.47                                      | 0.74 - 2.91 | 0.27               |
| Hispanic                                                                                 | 1.42                                     | 0.26 - 7.65   | 0.68              | 1.26                                      | 0.74 - 2.13 | 0.40               |
| Other                                                                                    | 1.41                                     | 0.15 - 13.08  | 0.76              | 0.30                                      | 0.09 - 0.97 | 0.04               |
| <b>Sex</b>                                                                               |                                          |               |                   |                                           |             |                    |
| Female                                                                                   | REF                                      |               |                   | REF                                       |             |                    |
| Male                                                                                     | 1.85                                     | 0.68 - 5.05   | 0.23              | 0.91                                      | 0.63 - 1.30 | 0.59               |
| <b>Annual Household Income</b>                                                           |                                          |               |                   |                                           |             |                    |
| ≥\$75,000                                                                                | REF                                      |               | 0.72 <sup>b</sup> | REF                                       |             | 0.048 <sup>b</sup> |
| \$50,000-74,999                                                                          | 2.03                                     | 0.61 - 6.81   | 0.25              | 1.66                                      | 1.04 - 2.64 | 0.03               |
| <\$50,000                                                                                | 1.32                                     | 0.38 - 4.55   | 0.66              | 1.07                                      | 0.67 - 1.70 | 0.79               |
| <b>Education</b>                                                                         |                                          |               |                   |                                           |             |                    |
| ≥College                                                                                 | REF                                      |               | 0.27 <sup>b</sup> | REF                                       |             | 0.26 <sup>b</sup>  |
| High School to some College                                                              | 1.02                                     | 0.34 - 3.01   | 0.98              | 1.31                                      | 0.88 - 1.96 | 0.18               |
| <High School                                                                             | 3.01                                     | 0.72 - 12.51  | 0.13              | 1.46                                      | 0.87 - 2.46 | 0.15               |
| <b>Chronic Health Conditions (severe/life-threatening)</b>                               |                                          |               |                   |                                           |             |                    |
| No                                                                                       | REF                                      |               |                   | REF                                       |             |                    |
| Yes                                                                                      | 1.03                                     | 0.39 - 2.71   | 0.96              | 1.55                                      | 1.07 - 2.23 | 0.02               |
| <b>Contact with COVID-19 test positive individuals (family members/ friends/at work)</b> |                                          |               |                   |                                           |             |                    |
| No                                                                                       | REF                                      |               |                   | REF                                       |             |                    |
| Yes                                                                                      | 19.78                                    | 4.10 - 95.42  | 0.0002            | 4.55                                      | 2.89 - 7.16 | <.0001             |
| <b>Always Wear Mask</b>                                                                  |                                          |               |                   |                                           |             |                    |
| No                                                                                       | REF                                      |               |                   | REF                                       |             |                    |
| Yes                                                                                      | 0.79                                     | 0.19 - 3.21   | 0.74              | 0.45                                      | 0.27 - 0.73 | 0.001              |
| <b>Always Stay 6 Feet Away</b>                                                           |                                          |               |                   |                                           |             |                    |
| No                                                                                       | REF                                      |               |                   | REF                                       |             |                    |
| Yes                                                                                      | 1.19                                     | 0.39 - 3.65   | 0.76              | 1.03                                      | 0.67 - 1.58 | 0.90               |
| <b>Always Wash Hands</b>                                                                 |                                          |               |                   |                                           |             |                    |
| No                                                                                       | REF                                      |               |                   | REF                                       |             |                    |
| Yes                                                                                      | 0.35                                     | 0.12 - 1.08   | 0.07              | 1.21                                      | 0.83 - 1.77 | 0.31               |
| <b>Employment</b>                                                                        |                                          |               |                   |                                           |             |                    |
| Retired                                                                                  | REF                                      |               | 0.80 <sup>b</sup> | REF                                       |             | 0.16 <sup>b</sup>  |
| Employed                                                                                 | 1.66                                     | 0.37 - 7.50   | 0.51              | 1.39                                      | 0.83 - 2.32 | 0.21               |
| Not Employed                                                                             | 1.54                                     | 0.23 - 10.21  | 0.65              | 1.81                                      | 0.98 - 3.35 | 0.057              |

a: Blood or marrow transplant; b: p-value for whole group



**Supplemental Table 4. Factors Associated with COVID-19 Infection Among BMT<sup>P</sup> Survivors, Pre- and Post-Vaccine Era**

| Variable                                                                                 | Multivariable analysis <sup>b</sup> (Pre-vaccine era) |                      |                   | Multivariable analysis (Post-vaccine era) |                    |                    |
|------------------------------------------------------------------------------------------|-------------------------------------------------------|----------------------|-------------------|-------------------------------------------|--------------------|--------------------|
|                                                                                          | aHR                                                   | 95%CI                | <i>p</i> -value   | aHR                                       | 95%CI              | <i>p</i> -value    |
| <b>Race/ Ethnicity</b>                                                                   |                                                       |                      |                   |                                           |                    |                    |
| Non-Hispanic White                                                                       | REF                                                   |                      | 0.10 <sup>b</sup> | REF                                       |                    | 0.051 <sup>b</sup> |
| African American                                                                         | <b>15.9</b>                                           | <b>1.71 – 147.17</b> | 0.01              | 1.41                                      | 0.66 – 2.98        | 0.38               |
| Hispanic                                                                                 | 2.02                                                  | 0.44 – 9.23          | 0.36              | 1.80                                      | <b>1.06 – 3.05</b> | <b>0.03</b>        |
| Other                                                                                    | 1.38                                                  | 0.18 – 10.66         | 0.76              | 0.43                                      | 0.14 – 1.37        | 0.15               |
| <b>Sex</b>                                                                               |                                                       |                      |                   |                                           |                    |                    |
| Female                                                                                   |                                                       |                      |                   | REF                                       |                    |                    |
| Male                                                                                     |                                                       |                      |                   | 0.69                                      | 0.46 – 1.03        | 0.07               |
| <b>Contact with COVID-19 test positive individuals (family members/ friends/at work)</b> |                                                       |                      |                   |                                           |                    |                    |
| No                                                                                       | REF                                                   |                      |                   | REF                                       |                    |                    |
| Yes                                                                                      | <b>15.9</b>                                           | <b>3.54 – 71.60</b>  | <b>0.0003</b>     | <b>3.93</b>                               | <b>2.39 – 6.43</b> | <b>&lt;.0001</b>   |
| <b>Always Wear Mask</b>                                                                  |                                                       |                      |                   |                                           |                    |                    |
| No                                                                                       |                                                       |                      |                   | REF                                       |                    |                    |
| Yes                                                                                      |                                                       |                      |                   | <b>0.44</b>                               | <b>0.26 – 0.73</b> | <b>0.002</b>       |
| <b>Always Wash Hand</b>                                                                  |                                                       |                      |                   |                                           |                    |                    |
| No                                                                                       | REF                                                   |                      |                   |                                           |                    |                    |
| Yes                                                                                      | 0.36                                                  | 0.12 – 1.12          | 0.08              |                                           |                    |                    |
| <b>BMT Survivors Follow up year</b>                                                      |                                                       |                      |                   |                                           |                    |                    |
| ≥20 years                                                                                | REF                                                   |                      | 0.08 <sup>b</sup> |                                           |                    |                    |
| <10 years                                                                                | 0.33                                                  | 0.07 – 1.55          | 0.16              |                                           |                    |                    |
| 10–19 years                                                                              | 0.28                                                  | 0.08 – 0.98          | 0.046             |                                           |                    |                    |
| <b>Disease status at BMT</b>                                                             |                                                       |                      |                   |                                           |                    |                    |
| Standard risk                                                                            |                                                       |                      |                   | REF                                       |                    |                    |
| High risk                                                                                |                                                       |                      |                   | <b>1.55</b>                               | <b>1.04 – 2.33</b> | <b>0.03</b>        |

a: Blood or marrow transplant; b: p-value for whole group

b: This is only the final multivariable regression models; the initial univariate models included the relevant clinical and sociodemographic variables, as in the univariate analysis shown in Table 3.

**Supplemental Table 5. Risk of Hospitalization Among COVID-19 Positive Individuals – A Comparison between BMT<sup>a</sup> Survivors and non-BMT Comparison Group**

| Risk factors                                                                             | Univariate analysis |             |                   | Multivariable analysis |                    |              |
|------------------------------------------------------------------------------------------|---------------------|-------------|-------------------|------------------------|--------------------|--------------|
|                                                                                          | OR                  | 95%CI       | p-value           | aOR                    | 95%CI              | p-value      |
| <b>COVID-19 test positive BMT Survivors vs. Non-BMT Comparison Group</b>                 |                     |             |                   |                        |                    |              |
| Non-BMT                                                                                  | REF                 |             |                   | REF                    |                    |              |
| BMT Survivors                                                                            | 2.51                | 1.19 – 5.30 | 0.02              | <b>2.23</b>            | <b>0.99 – 5.05</b> | <b>0.053</b> |
| <b>Age at study participation</b>                                                        |                     |             |                   |                        |                    |              |
| <65 years                                                                                | REF                 |             |                   |                        |                    |              |
| ≥65 years                                                                                | 2.12                | 1.10 – 4.08 | 0.03              |                        |                    |              |
| <b>Race/ Ethnicity</b>                                                                   |                     |             |                   |                        |                    |              |
| Non-Hispanic White                                                                       | REF                 |             | 0.54 <sup>b</sup> |                        |                    |              |
| African American                                                                         | 2.21                | 0.67 – 7.35 | 0.20              |                        |                    |              |
| Hispanic                                                                                 | 1.22                | 0.50 – 2.98 | 0.67              |                        |                    |              |
| Other                                                                                    | 0.53                | 0.05 – 5.21 | 0.58              |                        |                    |              |
| <b>Sex</b>                                                                               |                     |             |                   |                        |                    |              |
| Female                                                                                   | REF                 |             |                   |                        |                    |              |
| Male                                                                                     | 0.80                | 0.43 – 1.49 | 0.49              |                        |                    |              |
| <b>Annual Household Income</b>                                                           |                     |             |                   |                        |                    |              |
| ≥\$75000                                                                                 | REF                 |             |                   | REF                    |                    |              |
| <\$75,000                                                                                | 1.44                | 0.76 – 2.74 | 0.26              | 1.48                   | 0.73 – 2.98        | 0.09         |
| <b>Education</b>                                                                         |                     |             |                   |                        |                    |              |
| ≥College                                                                                 | REF                 |             | 0.76 <sup>b</sup> |                        |                    |              |
| High School to some College                                                              | 0.78                | 0.39 – 1.56 | 0.48              |                        |                    |              |
| <High School                                                                             | 0.98                | 0.43 – 2.27 | 0.97              |                        |                    |              |
| <b>Have Insurance</b>                                                                    |                     |             |                   |                        |                    |              |
| No                                                                                       | REF                 |             |                   | REF                    |                    |              |
| Yes                                                                                      | 0.22                | 0.02 – 2.15 | 0.19              | 0.05                   | 0 – 0.77           | 0.03         |
| <b>Chronic Health Conditions</b>                                                         |                     |             |                   |                        |                    |              |
| Grade 0-2                                                                                | REF                 |             |                   | REF                    |                    |              |
| Grade 3-4                                                                                | 4.03                | 2.07 – 7.84 | <.0001            | 4.16                   | 2.02 – 8.58        | 0.0001       |
| <b>Contact with COVID-19 test positive individuals (family members/ friends/at work)</b> |                     |             |                   |                        |                    |              |
| No                                                                                       | REF                 |             |                   |                        |                    |              |
| Yes                                                                                      | 0.69                | 0.30 – 1.58 | 0.38              |                        |                    |              |
| <b>Always Wear Mask</b>                                                                  |                     |             |                   |                        |                    |              |
| No                                                                                       | REF                 |             |                   |                        |                    |              |
| Yes                                                                                      | 1.92                | 0.88 – 4.19 | 0.10              |                        |                    |              |
| <b>Always Stay 6 Feet Away</b>                                                           |                     |             |                   |                        |                    |              |
| No                                                                                       | REF                 |             |                   | REF                    |                    |              |
| Yes                                                                                      | 2.20                | 1.14 – 4.25 | 0.02              | 2.45                   | 1.18 – 5.12        | 0.02         |
| <b>Always Wash Hands</b>                                                                 |                     |             |                   |                        |                    |              |
| No                                                                                       | REF                 |             |                   |                        |                    |              |
| Yes                                                                                      | 1.20                | 0.65 – 2.22 | 0.57              |                        |                    |              |
| <b>Employment</b>                                                                        |                     |             |                   |                        |                    |              |
| Retired                                                                                  | REF                 |             | 0.26 <sup>b</sup> |                        |                    |              |
| Employed                                                                                 | 0.61                | 0.29 – 1.28 | 0.19              |                        |                    |              |
| Not Employed                                                                             | 1.08                | 0.43 – 2.72 | 0.87              |                        |                    |              |

a: Blood or marrow transplant; b: p-value for whole group

**Supplemental Table 6. Risk of Hospitalization Among BMT<sup>a</sup> Survivors**

| Risk factors                                                                             | Univariate analysis |             |                     | Multivariable analysis |                    |                          |
|------------------------------------------------------------------------------------------|---------------------|-------------|---------------------|------------------------|--------------------|--------------------------|
|                                                                                          | OR                  | 95%CI       | p-value             | aOR                    | 95%CI              | p-value                  |
| <b>COVID-19 test positive vs. negative</b>                                               |                     |             |                     |                        |                    |                          |
| Not Positive                                                                             | REF                 |             |                     | REF                    |                    |                          |
| Positive                                                                                 | 1.24                | 0.86 – 1.79 | 0.24                | 1.32                   | 0.89 – 1.95        | 0.17                     |
| <b>Age at study participation</b>                                                        |                     |             |                     |                        |                    |                          |
| <65 years                                                                                | REF                 |             |                     | REF                    |                    |                          |
| ≥65 years                                                                                | 1.89                | 1.60 – 2.23 | <.0001              | <b>1.58</b>            | <b>1.31 – 1.90</b> | <b>&lt;.0001</b>         |
| <b>Race/ Ethnicity</b>                                                                   |                     |             |                     |                        |                    |                          |
| Non-Hispanic White                                                                       | REF                 |             | 0.0002 <sup>b</sup> | REF                    |                    | <b>0.001<sup>b</sup></b> |
| African American                                                                         | 0.70                | 0.48 – 1.02 | 0.06                | <b>0.61</b>            | <b>0.41 – 0.91</b> | <b>0.02</b>              |
| Hispanic                                                                                 | 0.72                | 0.55 – 0.95 | 0.02                | <b>0.78</b>            | <b>0.58 – 1.04</b> | <b>0.09</b>              |
| Other                                                                                    | 0.54                | 0.39 – 0.75 | 0.0002              | <b>0.56</b>            | <b>0.40 – 0.80</b> | <b>0.001</b>             |
| <b>Sex</b>                                                                               |                     |             |                     |                        |                    |                          |
| Female                                                                                   | REF                 |             |                     |                        |                    |                          |
| Male                                                                                     | 1.09                | 0.93 – 1.28 | 0.30                |                        |                    |                          |
| <b>Annual Household Income</b>                                                           |                     |             |                     |                        |                    |                          |
| ≥\$75000                                                                                 | REF                 |             |                     |                        |                    |                          |
| <\$75,000                                                                                | 0.90                | 0.76 – 1.08 | 0.25                |                        |                    |                          |
| <b>Education</b>                                                                         |                     |             |                     |                        |                    |                          |
| ≥College                                                                                 | REF                 |             | 0.84 <sup>b</sup>   |                        |                    |                          |
| High School to some College                                                              | 0.95                | 0.80 – 1.14 | 0.59                |                        |                    |                          |
| <High School                                                                             | 0.95                | 0.75 – 1.20 | 0.67                |                        |                    |                          |
| <b>Have Insurance</b>                                                                    |                     |             |                     |                        |                    |                          |
| No                                                                                       | REF                 |             |                     |                        |                    |                          |
| Yes                                                                                      | 1.41                | 0.77 – 2.59 | 0.27                |                        |                    |                          |
| <b>Chronic Health Conditions</b>                                                         |                     |             |                     |                        |                    |                          |
| Grade 0-2                                                                                | REF                 |             |                     | REF                    |                    |                          |
| Grade 3-4                                                                                | 2.12                | 1.79 – 2.50 | <.0001              | <b>1.89</b>            | <b>1.58 – 2.25</b> | <b>&lt;.0001</b>         |
| <b>Contact with COVID-19 test positive individuals (family members/ friends/at work)</b> |                     |             |                     |                        |                    |                          |
| No                                                                                       | REF                 |             |                     |                        |                    |                          |
| Yes                                                                                      | 1.03                | 0.88 – 1.22 | 0.70                |                        |                    |                          |
| <b>Always Wear Mask</b>                                                                  |                     |             |                     |                        |                    |                          |
| No                                                                                       | REF                 |             |                     |                        |                    |                          |
| Yes                                                                                      | 1.22                | 0.95 – 1.58 | 0.12                |                        |                    |                          |
| <b>Always Stay 6 Feet Away</b>                                                           |                     |             |                     |                        |                    |                          |
| No                                                                                       | REF                 |             |                     |                        |                    |                          |
| Yes                                                                                      | 1.10                | 0.92 – 1.31 | 0.31                |                        |                    |                          |
| <b>Always Wash Hands</b>                                                                 |                     |             |                     |                        |                    |                          |
| No                                                                                       | REF                 |             |                     |                        |                    |                          |
| Yes                                                                                      | 0.85                | 0.72 – 1.00 | 0.052               |                        |                    |                          |
| <b>Employment</b>                                                                        |                     |             |                     |                        |                    |                          |
| Retired                                                                                  | REF                 |             | <.0001 <sup>b</sup> |                        |                    |                          |
| Employed                                                                                 | 0.56                | 0.47 – 0.67 | <.0001              |                        |                    |                          |
| Not Employed                                                                             | 0.71                | 0.56 – 0.89 | 0.004               |                        |                    |                          |
| <b>BMT Type</b>                                                                          |                     |             |                     |                        |                    |                          |
| Autologous                                                                               | REF                 |             | 0.04 <sup>b</sup>   | REF                    |                    | 0.04 <sup>b</sup>        |
| Allogeneic without chronic GvHD <sup>b</sup>                                             | 0.76                | 0.62 – 0.94 | 0.01                | 1.10                   | 0.83 – 1.48        | 0.51                     |
| Allogeneic with chronic GvHD                                                             | 0.91                | 0.75 – 1.10 | 0.32                | <b>1.38</b>            | <b>1.06 – 1.80</b> | <b>0.02</b>              |
| <b>BMT Survivors Follow up years</b>                                                     |                     |             |                     |                        |                    |                          |
| ≥20 years                                                                                | REF                 |             | 0.01 <sup>b</sup>   | REF                    |                    | <.0001 <sup>b</sup>      |
| <10 years                                                                                | 0.74                | 0.59 – 0.93 | 0.01                | 0.52                   | 0.40 – 0.67        | <.0001                   |
| 10-19 years                                                                              | 0.79                | 0.65 – 0.95 | 0.01                | 0.62                   | 0.50 – 0.77        | <.0001                   |
| <b>BMT Survivors Primary Cancer</b>                                                      |                     |             |                     |                        |                    |                          |
| Lymphoma                                                                                 | REF                 |             | <.0001 <sup>b</sup> | REF                    |                    | <.0001 <sup>b</sup>      |

|                                             |      |             |        |             |                    |              |
|---------------------------------------------|------|-------------|--------|-------------|--------------------|--------------|
| Leukemia                                    | 0.86 | 0.71 – 1.04 | 0.12   | 0.68        | 0.53 – 0.89        | 0.004        |
| Plasma cell dyscrasias                      | 1.36 | 1.08 – 1.71 | 0.01   | <b>1.51</b> | <b>1.17 – 1.96</b> | <b>0.002</b> |
| Other                                       | 0.50 | 0.35 – 0.71 | 0.0001 | 0.46        | 0.30 – 0.71        | 0.0004       |
| <b>BMT Survivors Conditioning Intensity</b> |      |             |        |             |                    |              |
| NMA/RIC <sup>c</sup>                        | REF  |             |        |             |                    |              |
| MAC <sup>d</sup>                            | 1.09 | 0.92 – 1.29 | 0.35   |             |                    |              |
| <b>Disease Status at BMT</b>                |      |             |        |             |                    |              |
| Standard risk                               | REF  |             |        |             |                    |              |
| High risk                                   | 1.26 | 1.07 – 1.49 | 0.005  |             |                    |              |

a: Blood or marrow transplant; b: p-value for whole group

c: non-myeloablative or reduced intensity conditioning

d: myeloablative conditioning

**Supplemental Table 7. Risk of Emergency Department Visits Among COVID-19 Positive Individuals – a Comparison Between BMT Survivors and non-BMT Comparison Group**

| Risk factors                                                                             | Univariate analysis |              |                   | Multivariable analysis |                    |             |
|------------------------------------------------------------------------------------------|---------------------|--------------|-------------------|------------------------|--------------------|-------------|
|                                                                                          | OR                  | 95%CI        | p-value           | aOR                    | 95%CI              | p-value     |
| <b>COVID-19 test positive – BMT Survivors vs. non-BMT Comparison</b>                     |                     |              |                   |                        |                    |             |
| Non-BMT Comparison                                                                       | REF                 |              |                   | REF                    |                    |             |
| BMT Survivors                                                                            | 1.68                | 0.77 – 3.63  | 0.19              | 1.60                   | 0.71 – 3.58        | 0.25        |
| <b>Age at study participation</b>                                                        |                     |              |                   |                        |                    |             |
| <65 years                                                                                | REF                 |              |                   | REF                    |                    |             |
| ≥65 years                                                                                | 2.35                | 1.19 – 4.65  | 0.01              | <b>2.17</b>            | <b>1.07 – 4.40</b> | <b>0.03</b> |
| <b>Race/ Ethnicity</b>                                                                   |                     |              |                   |                        |                    |             |
| Non-Hispanic White                                                                       | REF                 |              | 0.14 <sup>b</sup> |                        |                    |             |
| African American                                                                         | 3.35                | 1.00 – 11.23 | 0.049             |                        |                    |             |
| Hispanic                                                                                 | 0.67                | 0.23 – 1.92  | 0.45              |                        |                    |             |
| Other                                                                                    | 2.40                | 0.33 – 17.63 | 0.39              |                        |                    |             |
| <b>Sex</b>                                                                               |                     |              |                   |                        |                    |             |
| Female                                                                                   | REF                 |              |                   |                        |                    |             |
| Male                                                                                     | 0.86                | 0.45 – 1.65  | 0.64              |                        |                    |             |
| <b>Annual Household Income</b>                                                           |                     |              |                   |                        |                    |             |
| ≥\$75000                                                                                 | REF                 |              |                   | REF                    |                    |             |
| <\$75,000                                                                                | 2.55                | 1.23 – 5.30  | 0.02              | <b>2.29</b>            | <b>1.09 – 4.83</b> | <b>0.05</b> |
| <b>Education</b>                                                                         |                     |              |                   |                        |                    |             |
| ≥College                                                                                 | REF                 |              | 0.99 <sup>b</sup> |                        |                    |             |
| High School to some College                                                              | 0.97                | 0.49 – 2.01  | 0.91              |                        |                    |             |
| <High School                                                                             | 0.95                | 0.39 – 2.39  | 0.93              |                        |                    |             |
| <b>Chronic Health Conditions</b>                                                         |                     |              |                   |                        |                    |             |
| Grade 0-2                                                                                | REF                 |              |                   |                        |                    |             |
| Grade 3-4                                                                                | 1.53                | 0.79 – 2.97  | 0.21              |                        |                    |             |
| <b>Contact with COVID-19 test positive individuals (family members/ friends/at work)</b> |                     |              |                   |                        |                    |             |
| No                                                                                       | REF                 |              |                   |                        |                    |             |
| Yes                                                                                      | 0.41                | 0.18 – 0.95  | 0.04              |                        |                    |             |
| <b>Always Wear Mask</b>                                                                  |                     |              |                   |                        |                    |             |
| No                                                                                       | REF                 |              |                   |                        |                    |             |
| Yes                                                                                      | 1.34                | 0.59 – 3.01  | 0.48              |                        |                    |             |
| <b>Always Stay 6 Feet Away</b>                                                           |                     |              |                   |                        |                    |             |
| No                                                                                       | REF                 |              |                   |                        |                    |             |
| Yes                                                                                      | 1.29                | 0.65 – 2.54  | 0.47              |                        |                    |             |
| <b>Always Wash Hands</b>                                                                 |                     |              |                   |                        |                    |             |
| No                                                                                       | REF                 |              |                   |                        |                    |             |
| Yes                                                                                      | 1.20                | 0.62 – 2.31  | 0.59              |                        |                    |             |
| <b>Employment</b>                                                                        |                     |              |                   |                        |                    |             |
| Retired                                                                                  | REF                 |              | 0.07 <sup>b</sup> |                        |                    |             |
| Employed                                                                                 | 0.48                | 0.22 – 1.05  | 0.06              |                        |                    |             |
| Not Employed                                                                             | 1.11                | 0.43 – 2.83  | 0.84              |                        |                    |             |

a: Blood or marrow transplant; b: p-value for whole group

**Supplemental Table 8. Risk of Emergency Department Visits Infection Among BMT<sup>a</sup> Survivors**

| Risk factors                                                                             | Univariate analysis |             |                     | Multivariable analysis |                    |                  |
|------------------------------------------------------------------------------------------|---------------------|-------------|---------------------|------------------------|--------------------|------------------|
|                                                                                          | OR                  | 95%CI       | p-value             | aOR                    | 95%CI              | p-value          |
| <b>COVID-19 test positive vs. negative</b>                                               |                     |             |                     |                        |                    |                  |
| Not positive                                                                             | REF                 |             |                     | REF                    |                    |                  |
| Positive                                                                                 | 2.44                | 1.65 – 3.61 | <.0001              | <b>2.63</b>            | <b>1.74 – 3.98</b> | <b>&lt;.0001</b> |
| <b>Age at study participation</b>                                                        |                     |             |                     |                        |                    |                  |
| <65 years                                                                                | REF                 |             |                     |                        |                    |                  |
| ≥65 years                                                                                | 1.39                | 1.13 – 1.71 | 0.002               |                        |                    |                  |
| <b>Race/ Ethnicity</b>                                                                   |                     |             |                     |                        |                    |                  |
| Non-Hispanic White                                                                       | REF                 |             | 0.03 <sup>b</sup>   |                        |                    |                  |
| African American                                                                         | 1.76                | 1.17 – 2.63 | 0.007               |                        |                    |                  |
| Hispanic                                                                                 | 1.28                | 0.93 – 1.77 | 0.13                |                        |                    |                  |
| Other                                                                                    | 1.07                | 0.72 – 1.58 | 0.73                |                        |                    |                  |
| <b>Sex</b>                                                                               |                     |             |                     |                        |                    |                  |
| Female                                                                                   | REF                 |             |                     |                        |                    |                  |
| Male                                                                                     | 1.02                | 0.83 – 1.25 | 0.86                |                        |                    |                  |
| <b>Annual Household Income</b>                                                           |                     |             |                     |                        |                    |                  |
| ≥\$75,000                                                                                | REF                 |             |                     |                        |                    |                  |
| <\$75,000                                                                                | 1.49                | 1.19 – 1.87 | 0.001               |                        |                    |                  |
| <b>Education</b>                                                                         |                     |             |                     |                        |                    |                  |
| ≥College                                                                                 | REF                 |             | 0.001 <sup>b</sup>  | REF                    |                    | 0.01             |
| High School to some College                                                              | 1.36                | 1.08 – 1.71 | 0.01                | <b>1.29</b>            | <b>1.02 – 1.63</b> | <b>0.04</b>      |
| <High School                                                                             | 1.65                | 1.24 – 2.20 | 0.001               | <b>1.52</b>            | <b>1.13 – 2.05</b> | <b>0.006</b>     |
| <b>Have Insurance</b>                                                                    |                     |             |                     |                        |                    |                  |
| No                                                                                       | REF                 |             |                     |                        |                    |                  |
| Yes                                                                                      | 1.93                | 0.76 – 4.91 | 0.17                |                        |                    |                  |
| <b>Chronic Health Conditions</b>                                                         |                     |             |                     |                        |                    |                  |
| Grade 0-2                                                                                | REF                 |             |                     | REF                    |                    |                  |
| Grade 3-4                                                                                | 1.68                | 1.35 – 2.08 | <.0001              | <b>1.50</b>            | <b>1.20 – 1.87</b> | <b>0.0004</b>    |
| <b>Contact with COVID-19 test positive individuals (family members/ friends/at work)</b> |                     |             |                     |                        |                    |                  |
| No                                                                                       | REF                 |             |                     |                        |                    |                  |
| Yes                                                                                      | 0.89                | 0.72 – 1.09 | 0.26                |                        |                    |                  |
| <b>Always Wear Mask</b>                                                                  |                     |             |                     |                        |                    |                  |
| No                                                                                       | REF                 |             |                     | REF                    |                    |                  |
| Yes                                                                                      | 1.61                | 1.12 – 2.32 | 0.01                | 1.69                   | 1.15 – 2.48        | 0.01             |
| <b>Always Stay 6 Feet Away</b>                                                           |                     |             |                     |                        |                    |                  |
| No                                                                                       | REF                 |             |                     |                        |                    |                  |
| Yes                                                                                      | 1.38                | 1.08 – 1.75 | 0.009               |                        |                    |                  |
| <b>Always Wash Hands</b>                                                                 |                     |             |                     |                        |                    |                  |
| No                                                                                       | REF                 |             |                     |                        |                    |                  |
| Yes                                                                                      | 1.13                | 0.92 – 1.39 | 0.24                |                        |                    |                  |
| <b>Employment</b>                                                                        |                     |             |                     |                        |                    |                  |
| Retired                                                                                  | REF                 |             | <.0001 <sup>b</sup> |                        |                    |                  |
| Employed                                                                                 | 0.61                | 0.48 – 0.77 | <.0001              |                        |                    |                  |
| Not Employed                                                                             | 1.21                | 0.92 – 1.59 | 0.18                |                        |                    |                  |
| <b>BMT Type</b>                                                                          |                     |             |                     |                        |                    |                  |
| Autologous                                                                               | REF                 |             | 0.01 <sup>b</sup>   |                        |                    |                  |
| Allogeneic without chronic GvHD <sup>b</sup>                                             | 0.67                | 0.51 – 0.88 | 0.004               |                        |                    |                  |
| Allogeneic with chronic GvHD                                                             | 0.80                | 0.63 – 1.02 | 0.07                |                        |                    |                  |
| <b>BMT Survivors Follow up years</b>                                                     |                     |             |                     |                        |                    |                  |
| ≥20 years                                                                                | REF                 |             | 0.77                |                        |                    |                  |
| <10 years                                                                                | 0.91                | 0.68 – 1.20 | 0.49                |                        |                    |                  |
| 10-19 years                                                                              | 0.94                | 0.74 – 1.19 | 0.59                |                        |                    |                  |
| <b>BMT Survivors Primary Cancer</b>                                                      |                     |             |                     |                        |                    |                  |
| Lymphoma                                                                                 | REF                 |             | 0.005 <sup>b</sup>  |                        |                    |                  |

|                                             |      |             |       |             |                    |             |
|---------------------------------------------|------|-------------|-------|-------------|--------------------|-------------|
| Leukemia                                    | 0.89 | 0.70 – 1.14 | 0.36  |             |                    |             |
| Plasma cell dyscrasias                      | 1.40 | 1.06 – 1.86 | 0.02  |             |                    |             |
| Other                                       | 0.75 | 0.48 – 1.18 | 0.22  |             |                    |             |
| <b>BMT Survivors Conditioning Intensity</b> |      |             |       |             |                    |             |
| NMA/RIC <sup>c</sup>                        | REF  |             |       |             |                    |             |
| MAC <sup>d</sup>                            | 1.15 | 0.92 – 1.44 | 0.22  |             |                    |             |
| <b>Disease Status at BMT</b>                |      |             |       |             |                    |             |
| Standard risk                               | REF  |             |       | REF         |                    |             |
| High risk                                   | 1.37 | 1.11 – 1.68 | 0.003 | <b>1.29</b> | <b>1.04 – 1.60</b> | <b>0.02</b> |

a: Blood or marrow transplant; b: p-value for whole group c: non-myeloablative or reduced intensity conditioning; d: myeloablative conditioning
